# Supplementary material for: Rapid, selective, and ultrasensitive fluorescence ratiometric detection of sulfide ions using dual-emitting BSA–erbium(iii)-modulated gold–silver bimetallic nanoclusters
Source: Royal Society of Chemistry journal article supplement (doi:10.1039/c5ay00685f), 2015-01-01
Supplement: c5ay00685f1.pdf [file c5ay00685f1.pdf]

Supporting Information for:

**Rapid, Selective, and Ultrasensitive Fluorescence Ratio-metric  
Detection of Sulfide Ions Using Dual-Emitting BSA-Erbium (III)-  
modulated Gold-Silver Bimetallic Nanoclusters**

Chun-Mei Li, Shou-Nian Ding\*

Jiangsu Province Hi-Tech Key Laboratory for Bio-medical Research, School of  
Chemistry and Chemical Engineering, Southeast University, Nanjing 211189, China.

\* Corresponding author. Tel/Fax: +86-25-52090621

E-mail: [snding@seu.edu.cn](mailto:snding@seu.edu.cn)

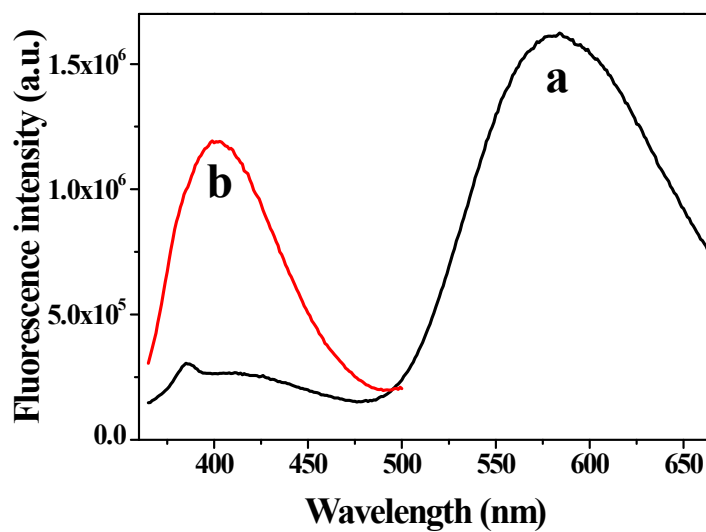

**Figure S1** Fluorescence spectra ( $\lambda_{\text{ex}} = 340$  nm) of BSA-Er/Au/Ag-NCs (a), BSA-Er complexes (b)

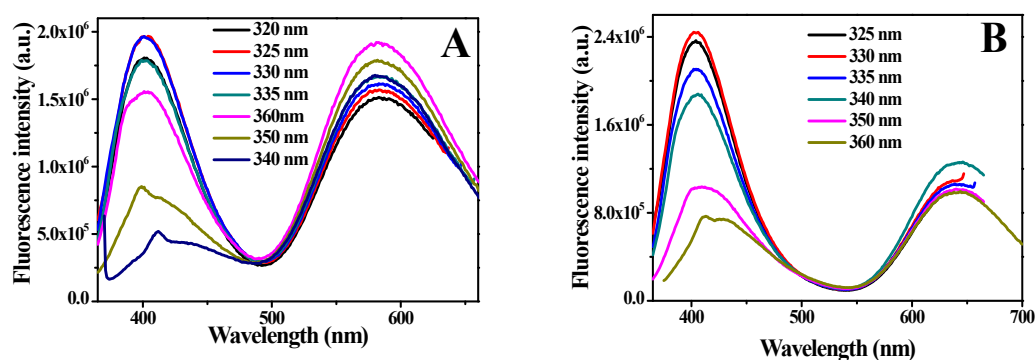

**Figure S2** FL spectra of the BSA-Er/Au/Ag-NCs (left), BSA-Er/Au-NCs (right) at different excitation wavelengths from 320 to 360 nm, both the excitation and emission slit widths were 5 nm.

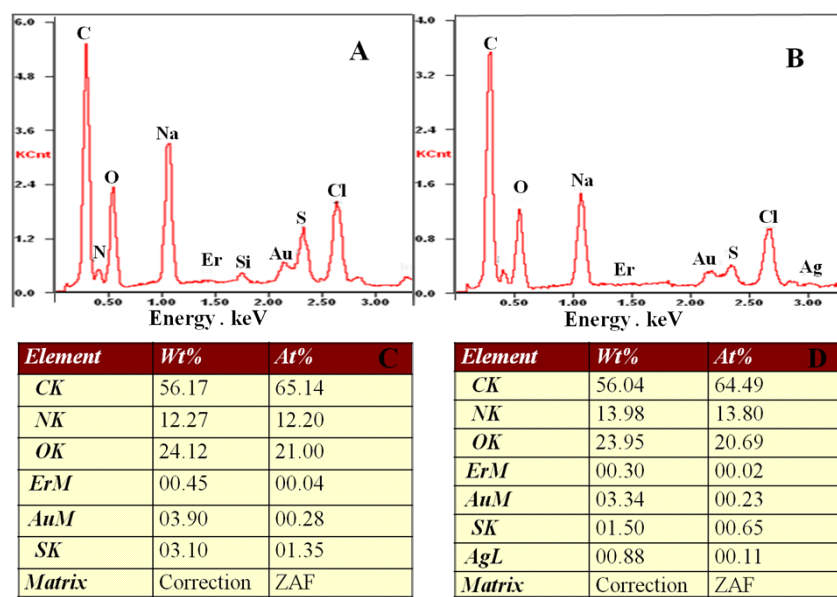

**Figure S3** EDS of BSA-Er/Au-NCs (A) and BSA-Er/Au/Ag-NCs (B); the element concentrations of Er, Au and Ag images of the BSA-Er/Au-NCs (C) and BSA-Er/Au/Ag-NCs (D).

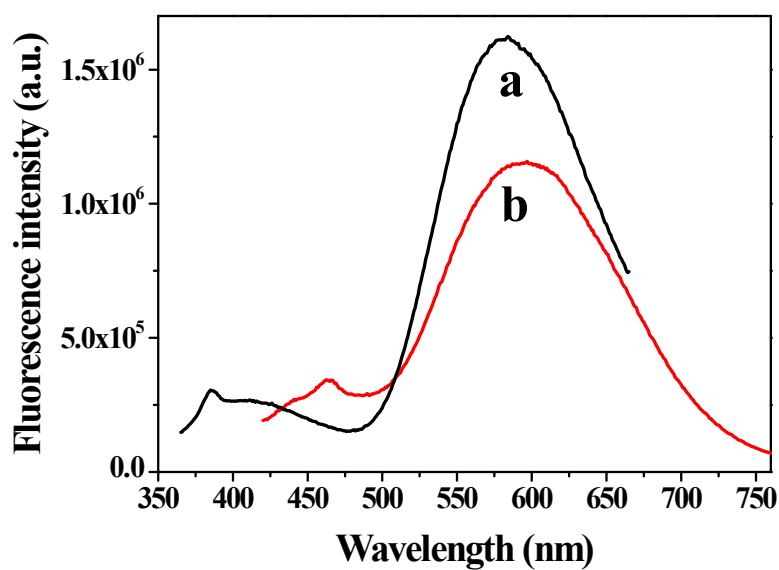

**Figure S4** Fluorescence spectra of BSA-Er/Au/Ag-NCs at excitation wavelength of 340 nm, at excitation wavelength of 400 nm (b).

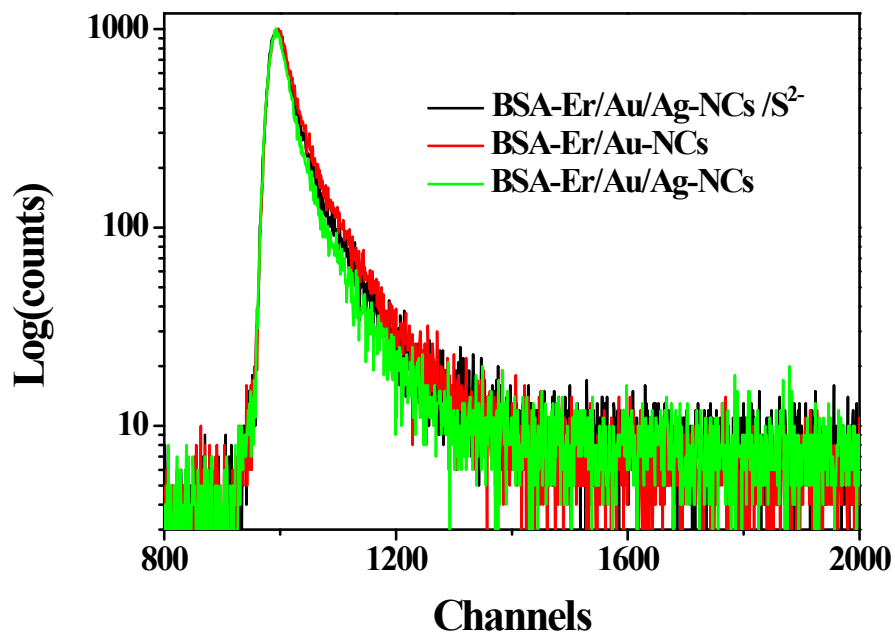

**Figure S5** Decay curves of luminescence lifetime of BSA-Er/Au/Ag-NCs in the presence of  $S^{2-}$  ions; BSA-Er/Au-NCs; BSA-Er/Au/Ag-NCs.

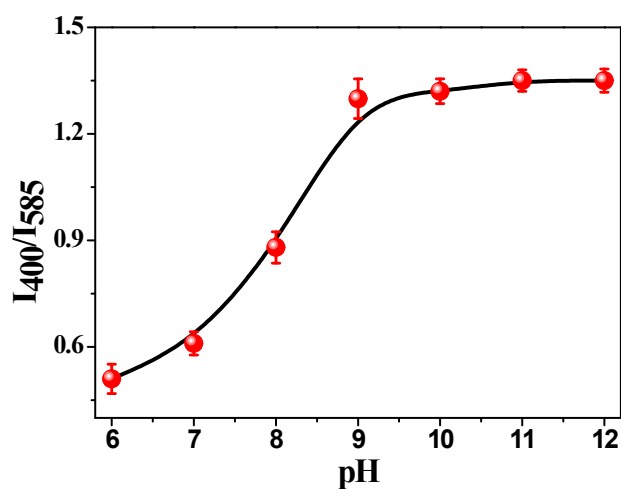

**Figure S6** Effect of pH on the photoluminescence of BSA-Er/Au/Ag-NCs in the HEPES buffer (5 mM). Concentration: The concentrations of  $S^{2-}$  ions, BSA-Er/Au/Ag-NCs are 100  $\mu$ M, 440  $\mu$ g/mL, respectively.  $\lambda_{ex}$ : 340 nm.

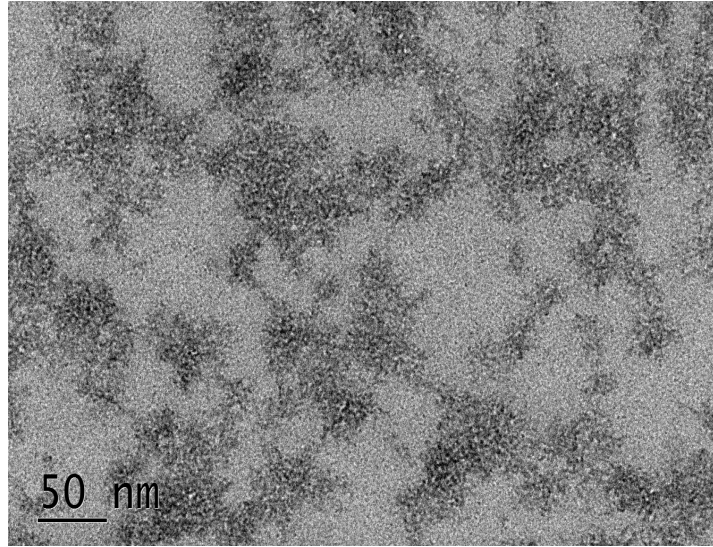

**Figure S7** The TEM imaging of BSA-Er/Au/Ag-NCs.
